# Supplementary material for: Abnormal methane occupancy of natural gas hydrates in deep sea floor sediments
Source: Royal Society of Chemistry journal article supplement (doi:10.1039/c0ee00355g), 2010-11-29
Supplement: c0ee00355g.pdf [file c0ee00355g.pdf]

## Supporting Information

### Abnormal Cage Occupancy of Natural Gas Hydrates in Deep Sea Floor Sediments

Sun-Hwa Yeon <sup>a</sup>, Jiwoong Seol <sup>b</sup>, Dong-Yeun Koh <sup>b</sup>, Young-ju Seo <sup>b</sup>, Keun-Pil Park <sup>c</sup>,  
Dae-Gee Huh <sup>c</sup>, Jaehyoung Lee <sup>c</sup> and Huen Lee <sup>\*b</sup>

<sup>a</sup> *Climate change Technology Research Division, Korea Institute of Energy Research, 102 Gajeong-ro, Yuseong-gu, Daejeon 305-343, Republic of Korea*

<sup>b</sup> *Department of Chemical and Biomolecular Engineering (BK21 program) and graduated school of EEWS, KAIST, 373-1 Guseong-dong, Yuseong-gu, Daejeon 305-701, Republic of Korea .*

<sup>c</sup> *Korea Institute of Geoscience and Mineral Resources, 30 Gajeong-dong, Yuseong-gu, 305-350, Daejeon, Republic of Korea*

\* corresponding author

E-mail: hlee@kaist.ac.kr; Fax: +82-42-350-3910; Tel +82-42-350-3917

Table S1. Inductively Coupled Plasma (ICP) and Energy Dispersive X-ray Fluorescence (XRF) Spectrometers of metals and some nonmetals in NGH sample (07GHP-6C).

|     | Al    | K     | Ca     | Ti    | Mn    | Fe    | Cu     | Sr   | Na    |
|-----|-------|-------|--------|-------|-------|-------|--------|------|-------|
| ppm | 117.4 | 29.56 | 154.2  | 4.391 | 0.811 | 44.96 | 0.0209 | 1.12 | 7.38  |
| %   | 3.846 | 0.968 | 5.0500 | 0.143 | 0.026 | 0.147 | 0.068  | 3.68 | 2.418 |

### **High resolution neutron powder diffraction (HRNPD)**

The NPD patterns were determined using a high-resolution ( $\lambda = 1.8372 \text{ \AA}$ ) neutron diffractometer installed at the horizontal channel ST2 of the 30MWt reactor “HANARO” of the Korea Atomic Energy Research Institute (KAERI). The resolution was variable as any of the four soller collimators with angular divergences  $\alpha_1 = 20'$ . The divergence  $\alpha_2 = 30'$  of the second collimator, as well as the divergence  $\alpha_3 = 10'$  of the third collimator were fixed. Low-temperature neutron diffraction measurements were made using a closed cycle refrigerator (CCR) with a cooling power of 0.5 W and a Si-diode sensor installed on the neutron beam. All neutron data was modeled using the Rietveld refinement package, GSAS [1] with EXPGUI [2] interface. As a starting point we took the parameters reported by heavy ice and methane hydrate and used only the lattice constants and thermal displacements as fit parameters [3].

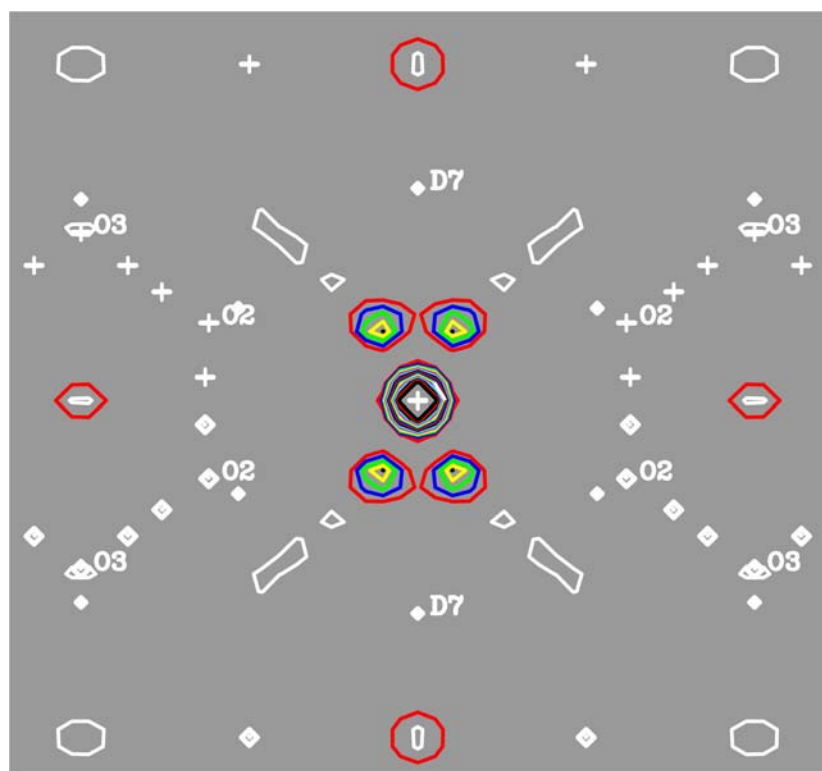

Fig. S1. Observed Fourier map of 35 wt% Na-MMT MH centered in the  $5^{12}$  cage at (0, 0, 0). The refinement was characterized by  $\chi^2 = 4.85$  and  $R_{wp} = 5.45\%$ .

Table S2. Rietveld refinement results for MH phase of the D<sub>2</sub>O host lattice, CD<sub>4</sub> and Na guest molecules.

(35wt% Na-MMT MH at 2.7K)

| Atom            | x      | y      | z      | Occupancy | Usio    |
|-----------------|--------|--------|--------|-----------|---------|
| Oxygen          | 0.1841 | 0.1841 | 0.1841 | 1         | 0.03409 |
| Oxygen          | 0.0000 | 0.3100 | 0.1154 | 1         | 0.01074 |
| Oxygen          | 0.0000 | 0.5000 | 0.2500 | 1         | 0.01009 |
| Deuterium       | 0.2314 | 0.2314 | 0.2314 | 0.5       | 0.51553 |
| Deuterium       | 0.0000 | 0.4305 | 0.2007 | 0.5       | 0.02613 |
| Deuterium       | 0.0000 | 0.3801 | 0.1614 | 0.5       | 0.06530 |
| Deuterium       | 0.0000 | 0.3157 | 0.0349 | 0.5       | 0.08954 |
| Deuterium       | 0.0673 | 0.2662 | 0.1373 | 0.5       | 0.06407 |
| Deuterium       | 0.1177 | 0.2257 | 0.1582 | 0.5       | 0.03796 |
| CD <sub>4</sub> | 0.25   | 0.5    | 0      | 1         | 0.45020 |
| CD <sub>4</sub> | 0      | 0      | 0      | 0.55      | 0.0250  |
| Na              | 0      | 0      | 0      | 0.45      | 0.03680 |

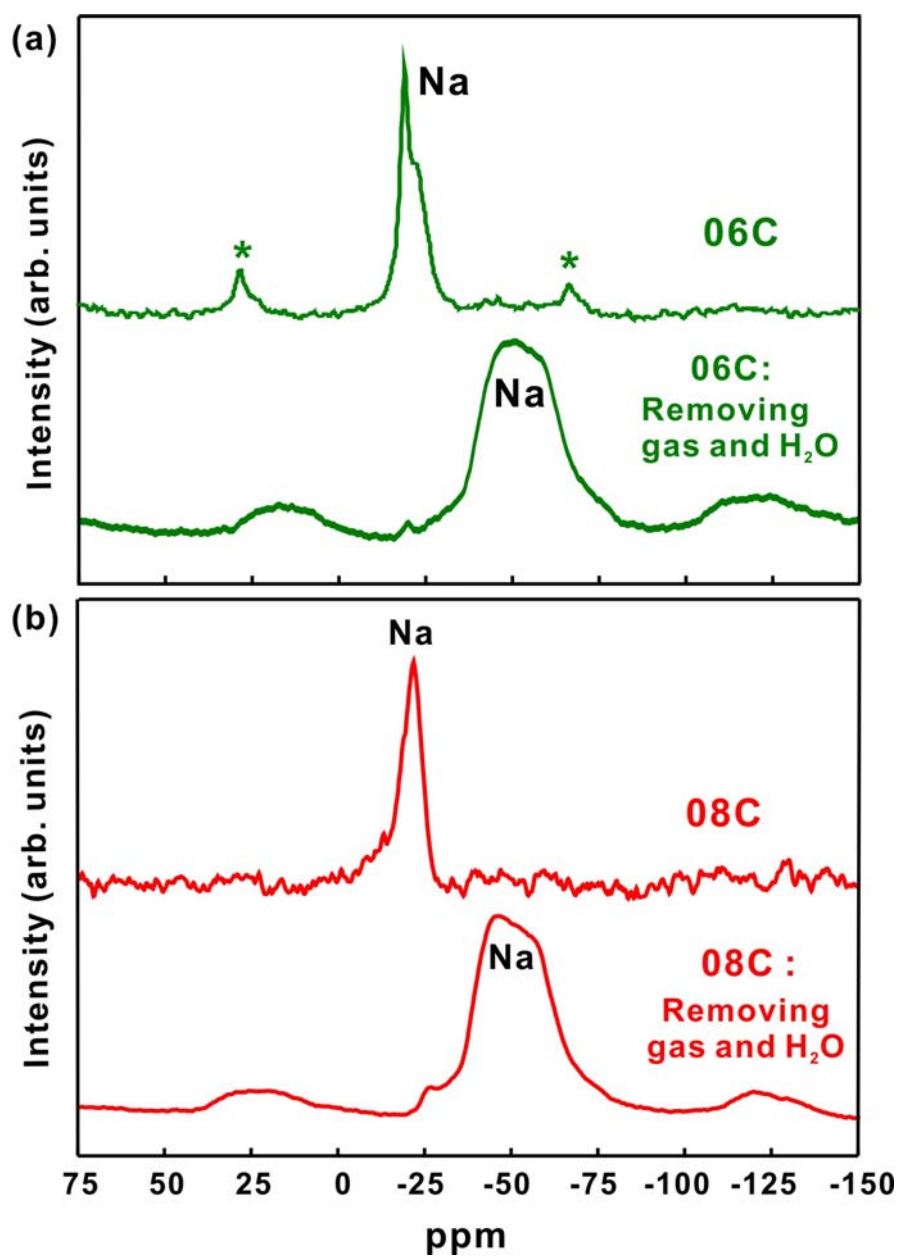

Fig. S2.  $^{23}\text{Na}$  MAS NMR data of natural methane hydrate sample from East Sea, Korea, 06 and 08C samples. The peaks of washed and dried sediment were detected at about -50 ppm, although those of the fully swollen sediment at about -25 ppm.

## References

- [1] Larson A C, Dreele R B V, General Structure Analysis System (GSAS); Los Alamos National Laboratory Report LAUR 86-748 (2000)
- [2] Toby B H, *J Appl Crystallogr* (2001) 34; 210.
- [3] Gutt C, Asmussen B, Press W, Handa Y P, Tse J S, (2000) *J Chem Phys* 113:4713.
